# Supplementary material for: Design, synthesis and pharmacological studies of some new quinoline Schiff bases and 2,5-(disubstituted-[1,3,4])-oxadiazoles
Source: Royal Society of Chemistry journal article supplement (doi:10.1039/c6nj03913h), 2017-01-01
Supplement: c6nj03913h1.pdf [file c6nj03913h1.pdf]

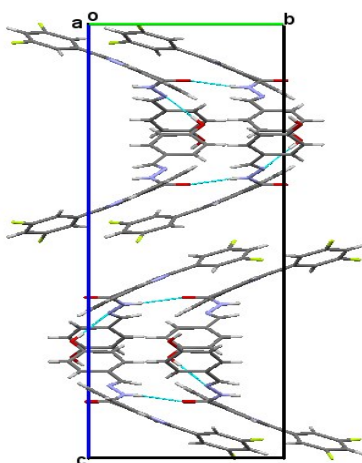

(I)

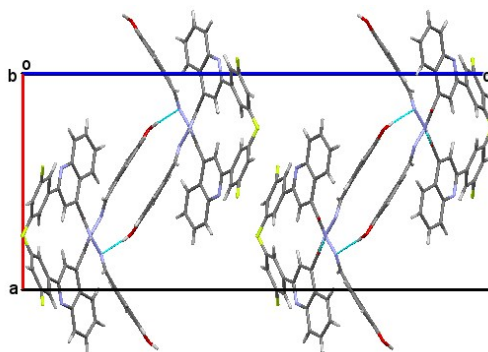

(II)

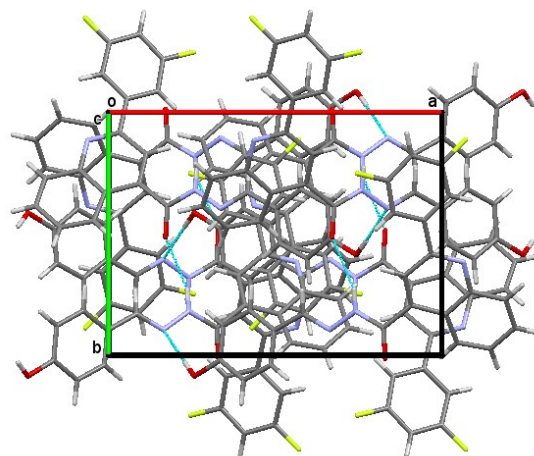

(III)

**Fig S1. Packing of the molecule when viewed along the (I) *a* axis, (II) *b* axis and (III) *c* axis.**

**Dotted lines represent inter-molecular hydrogen bonds linking the molecules.**

**Table S1: Physical properties and structural features of target compounds**

| <b>Compd</b> | <b>Ar</b>                                                             | <b>Ar<sup>1</sup></b>                            | <b>Mol. formula</b>                                                            | <b>Mol. weight</b> | <b>M. p. (°C)</b> |
|--------------|-----------------------------------------------------------------------|--------------------------------------------------|--------------------------------------------------------------------------------|--------------------|-------------------|
| <b>1</b>     | -                                                                     | -                                                | C <sub>16</sub> H <sub>9</sub> F <sub>2</sub> NO <sub>2</sub>                  | 285.24             | 230.5-232         |
| <b>2</b>     | -                                                                     | -                                                | C <sub>18</sub> H <sub>13</sub> F <sub>2</sub> NO <sub>2</sub>                 | 313.29             | 63-67             |
| <b>3</b>     | -                                                                     | -                                                | C <sub>16</sub> H <sub>11</sub> F <sub>2</sub> N <sub>3</sub> O <sub>2</sub>   | 299.27             | 238-241           |
| <b>4a</b>    | 3,4,5-(OCH <sub>3</sub> ) <sub>3</sub> -C <sub>6</sub> H <sub>2</sub> | -                                                | C <sub>26</sub> H <sub>19</sub> F <sub>2</sub> N <sub>3</sub> O <sub>4</sub>   | 475.44             | 97-102            |
| <b>4b</b>    | 4-F-C <sub>6</sub> H <sub>4</sub>                                     | -                                                | C <sub>23</sub> H <sub>12</sub> F <sub>3</sub> N <sub>3</sub> O                | 403.35             | 130-133           |
| <b>4c</b>    | 4-Cl-3-NO <sub>2</sub> -C <sub>6</sub> H <sub>3</sub>                 | -                                                | C <sub>23</sub> H <sub>11</sub> ClF <sub>2</sub> N <sub>4</sub> O <sub>3</sub> | 464.80             | 154-159           |
| <b>4d</b>    | 4-OH-C <sub>6</sub> H <sub>4</sub>                                    | -                                                | C <sub>23</sub> H <sub>13</sub> F <sub>2</sub> N <sub>3</sub> O <sub>2</sub>   | 401.36             | 223-227           |
| <b>4e</b>    | 4-Cl-C <sub>6</sub> H <sub>4</sub>                                    | -                                                | C <sub>23</sub> H <sub>12</sub> ClF <sub>2</sub> N <sub>3</sub> O              | 419.81             | 147-152           |
| <b>4f</b>    | 4-NO <sub>2</sub> -C <sub>6</sub> H <sub>4</sub>                      | -                                                | C <sub>23</sub> H <sub>12</sub> F <sub>2</sub> N <sub>4</sub> O <sub>3</sub>   | 430.36             | 203-208           |
| <b>4g</b>    | 4-NH <sub>2</sub> -C <sub>6</sub> H <sub>4</sub>                      | -                                                | C <sub>23</sub> H <sub>14</sub> F <sub>2</sub> N <sub>4</sub> O                | 400.38             | 192-195           |
| <b>5a</b>    | -                                                                     | 4-Br-C <sub>6</sub> H <sub>4</sub>               | C <sub>23</sub> H <sub>14</sub> BrF <sub>2</sub> N <sub>3</sub> O              | 466.28             | 269-273           |
| <b>5b</b>    | -                                                                     | 3-NO <sub>2</sub> -C <sub>6</sub> H <sub>4</sub> | C <sub>23</sub> H <sub>14</sub> F <sub>2</sub> N <sub>4</sub> O <sub>3</sub>   | 432.37             | 260-264           |

|           |   |                                                                       |                                                                                 |        |         |
|-----------|---|-----------------------------------------------------------------------|---------------------------------------------------------------------------------|--------|---------|
| <b>5c</b> | - | C <sub>4</sub> H <sub>3</sub> S                                       | C <sub>21</sub> H <sub>13</sub> F <sub>2</sub> N <sub>3</sub> OS                | 393.40 | 220-224 |
| <b>5d</b> | - | 3,4-(OCH <sub>3</sub> ) <sub>2</sub> -C <sub>6</sub> H <sub>3</sub>   | C <sub>25</sub> H <sub>19</sub> F <sub>2</sub> N <sub>3</sub> O <sub>3</sub>    | 447.43 | 237-241 |
| <b>5e</b> | - | 3,4,5-(OCH <sub>3</sub> ) <sub>3</sub> -C <sub>6</sub> H <sub>2</sub> | C <sub>26</sub> H <sub>21</sub> F <sub>2</sub> N <sub>3</sub> O <sub>4</sub>    | 477.45 | 242-247 |
| <b>5f</b> | - | 2,4-Cl <sub>2</sub> - C <sub>6</sub> H <sub>3</sub>                   | C <sub>23</sub> H <sub>13</sub> Cl <sub>2</sub> F <sub>2</sub> N <sub>3</sub> O | 456.27 | 264-268 |
| <b>5g</b> | - | 4-OH-C <sub>6</sub> H <sub>4</sub>                                    | C <sub>23</sub> H <sub>15</sub> F <sub>2</sub> N <sub>3</sub> O <sub>2</sub>    | 403.38 | 183-187 |

**Table S2: Crystal Data and refinement statistics**

| <b>Crystal Data and refinement statistics</b> |                                                                                         |
|-----------------------------------------------|-----------------------------------------------------------------------------------------|
| Empirical Formula                             | C <sub>23</sub> H <sub>15</sub> F <sub>2</sub> N <sub>3</sub> O <sub>2</sub>            |
| Formula Weight                                | 403.38                                                                                  |
| Crystal Color, Habit                          | yellow color, block                                                                     |
| Crystal Dimensions                            | 0.49 X 0.23 X 0.12 mm                                                                   |
| Crystal System                                | orthorhombic                                                                            |
| Lattice Type                                  | Primitive                                                                               |
| Lattice Parameters                            | a = 13.178 (7) Å<br>b = 9.598 (5) Å<br>c = 28.580 (17) Å<br>V = 3615 (3) Å <sup>3</sup> |
| Space Group                                   | Pbca                                                                                    |

|                                  |                                                                       |
|----------------------------------|-----------------------------------------------------------------------|
| Z value                          | 8                                                                     |
| D <sub>calc</sub>                | 1.482 g/cm <sup>3</sup>                                               |
| F <sub>000</sub>                 | 1664.0                                                                |
| μ(MoKα)                          | 0.111 cm <sup>-1</sup>                                                |
| Radiation                        | MoKα (λ = 0.71075 Å)                                                  |
| 2θ <sub>max</sub>                | 51°                                                                   |
| No. of Reflections Measured      | Total: 9388<br>Unique: 3267 (R <sub>int</sub> = 0.0612)               |
| Corrections                      | Lorentz-polarization<br>Absorption<br>(trans. factors: 0.874 - 0.972) |
| Structure Solution               | Direct Methods (SHELX97)                                              |
| Refinement                       | Full-matrix least-squares on F <sup>2</sup>                           |
| No. Variables                    | 272                                                                   |
| Residuals: R1 (I>2.00σ(I))       | 0.0884                                                                |
| Residuals: wR2 (All reflections) | 0.1263                                                                |
| Goodness of Fit Indicator        | 1.143                                                                 |
| Maximum peak in Final Diff. Map  | 0.23 e <sup>-</sup> /Å <sup>3</sup>                                   |
| Minimum peak in Final Diff. Map  | -0.18 e <sup>-</sup> /Å <sup>3</sup>                                  |
| CCDC                             | 1469162                                                               |

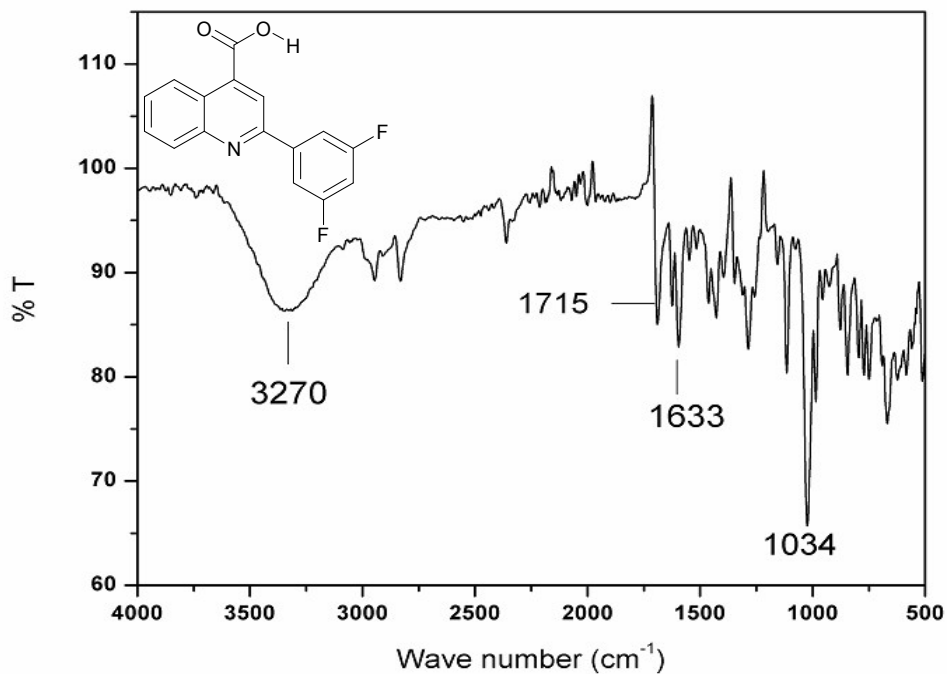

IR spectrum of compound (1) 2-(3,5-difluorophenyl)quinoline-4-carboxylic acid

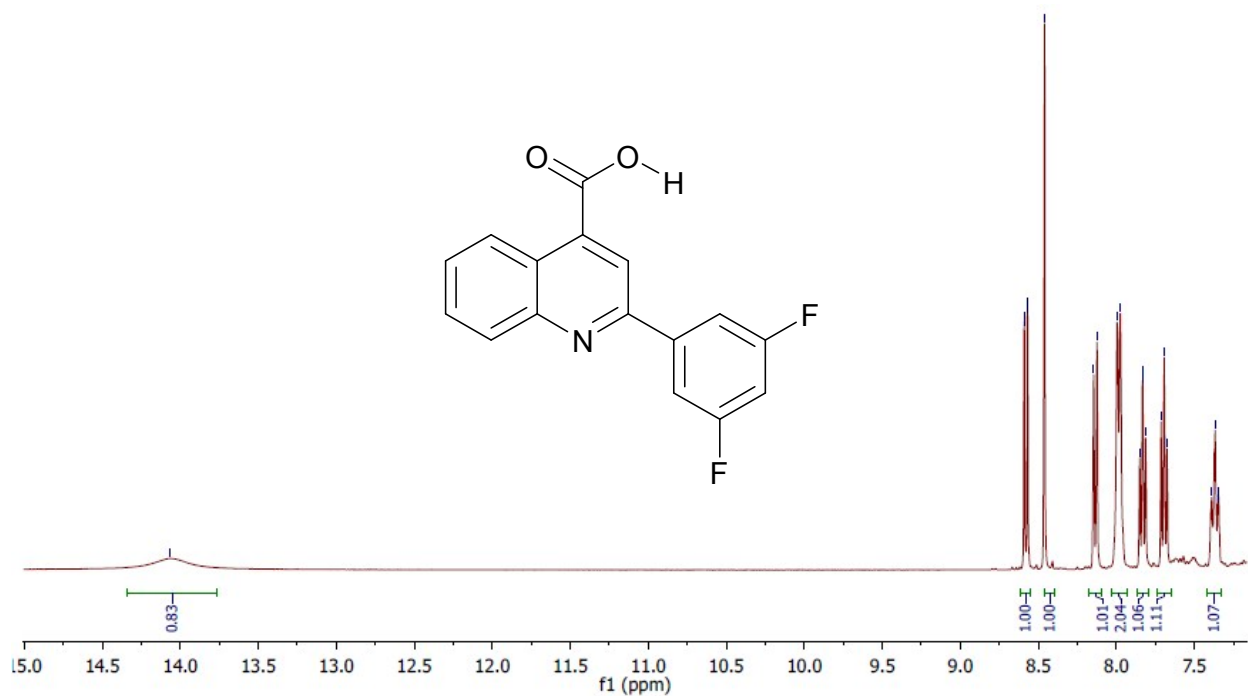

<sup>1</sup>H NMR of compound (1) 2-(3,5-difluorophenyl)quinoline-4-carboxylic acid

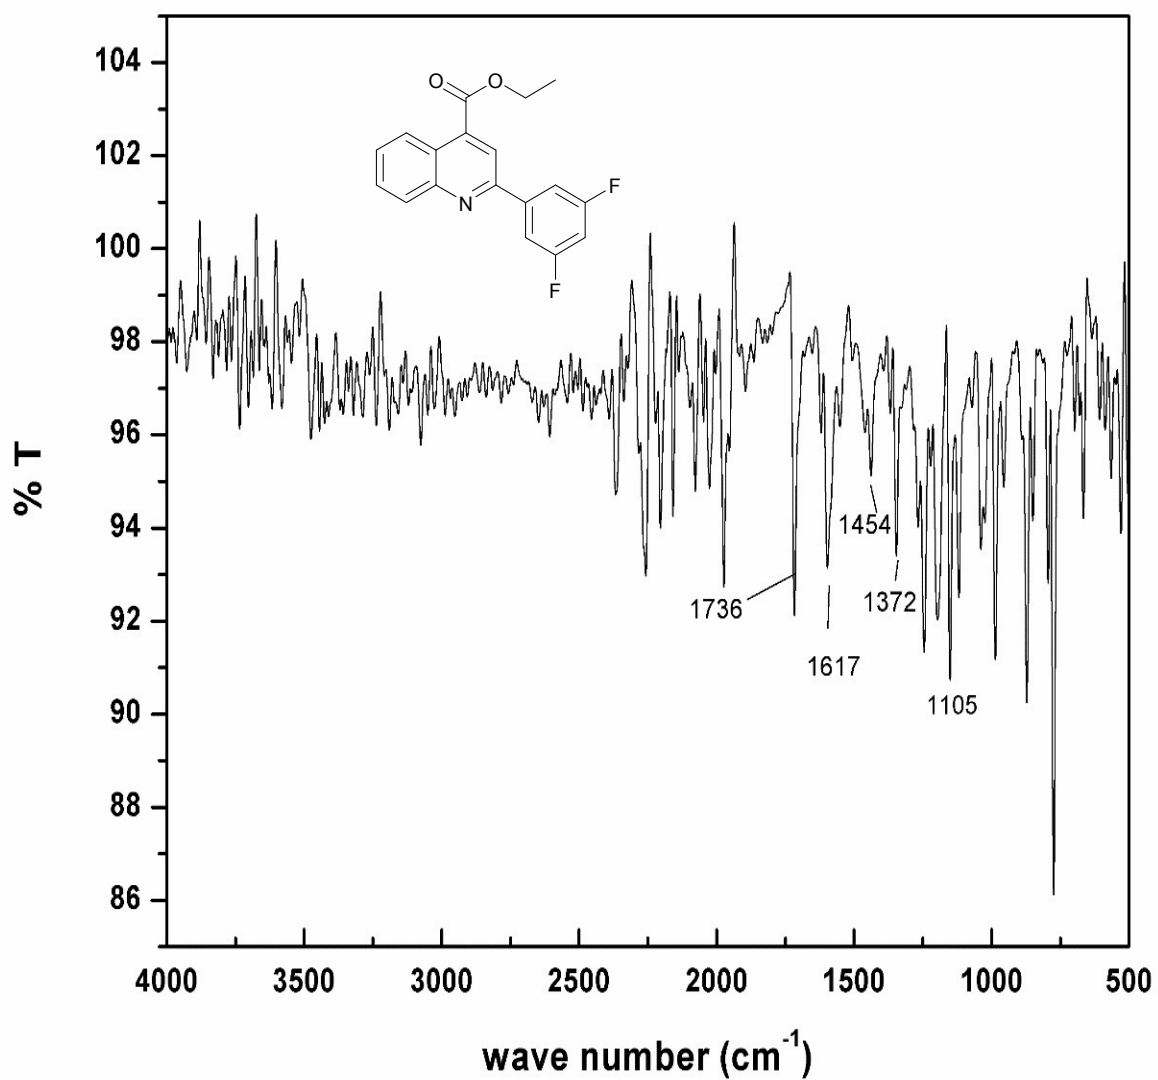

IR spectrum of compound (2) ethyl 2-(3,5-difluorophenyl)quinoline-4-carboxylate

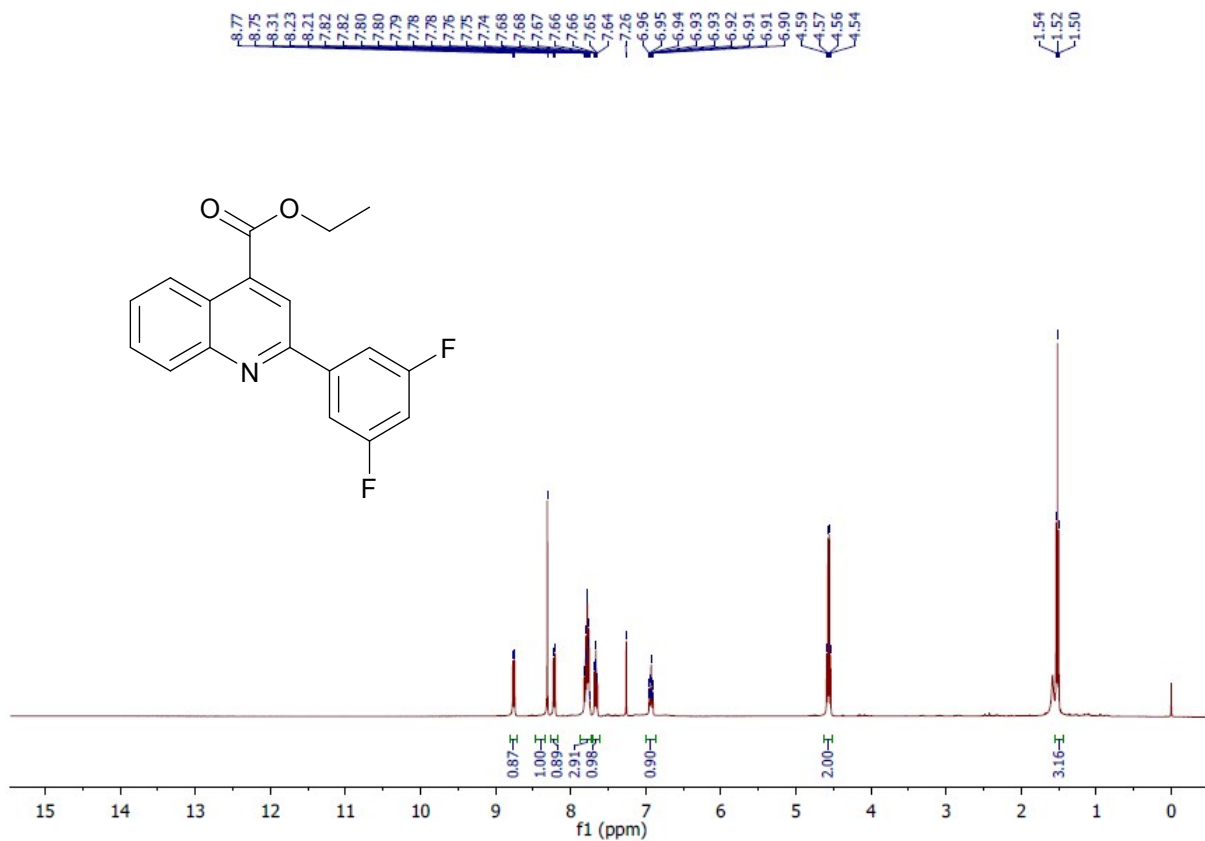

**<sup>1</sup>H NMR of compound (2) ethyl 2-(3,5-difluorophenyl)quinoline-4-carboxylate**



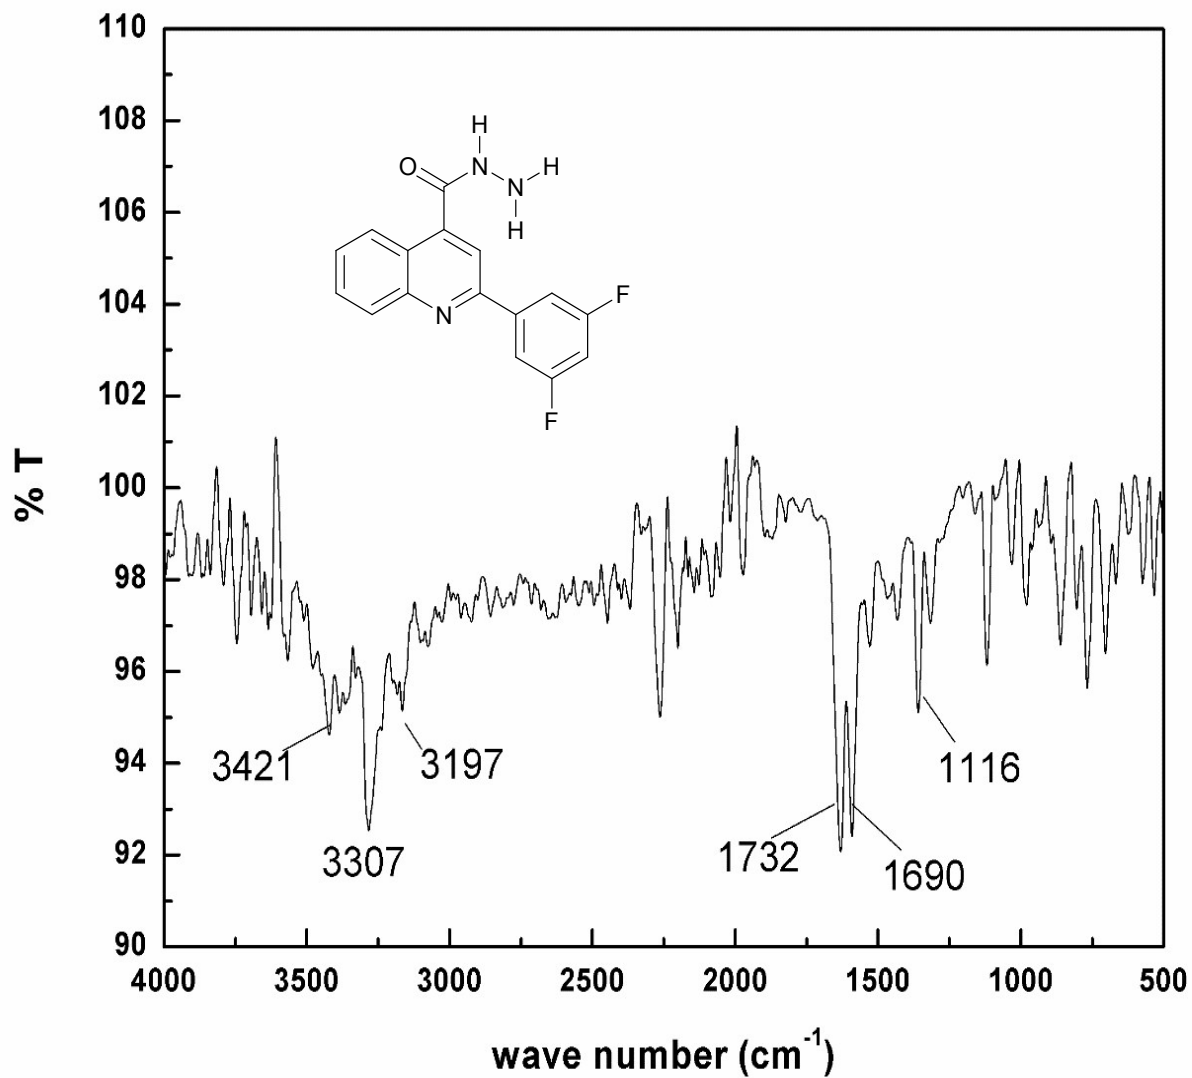

IR spectrum of compound (3) 2-(3,5-difluorophenyl)quinoline-4-carbohydrazide

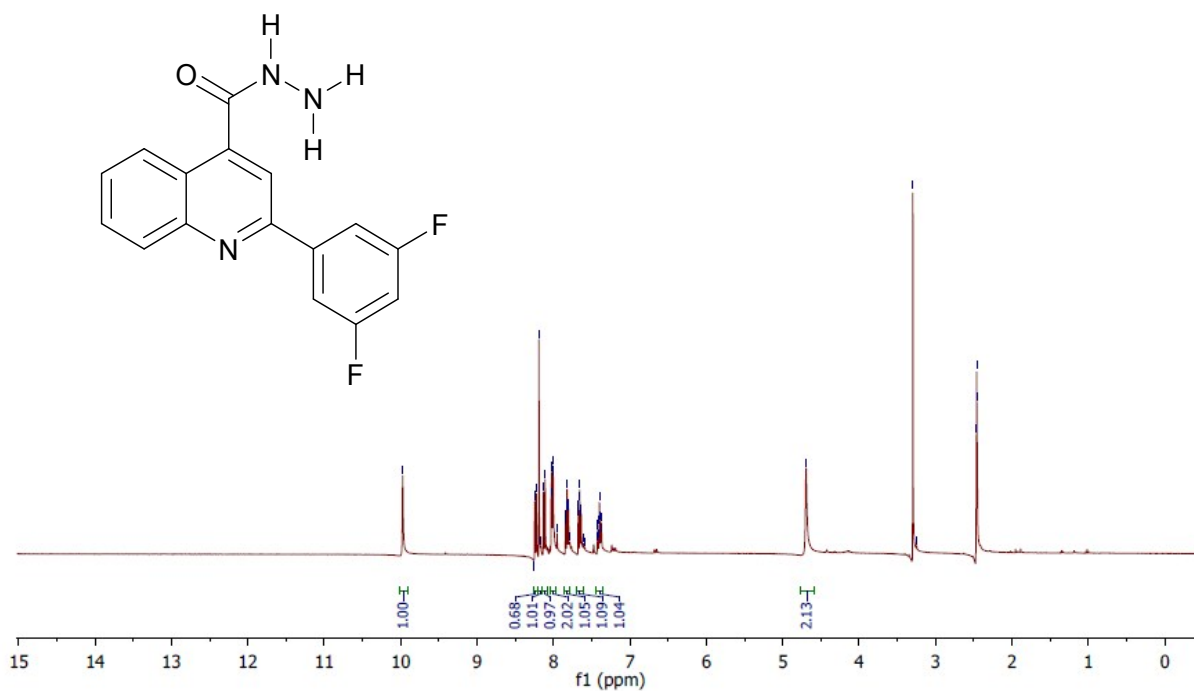

**<sup>1</sup>H NMR of compound (3) 2-(3,5-difluorophenyl)quinoline-4-carbohydrazide**

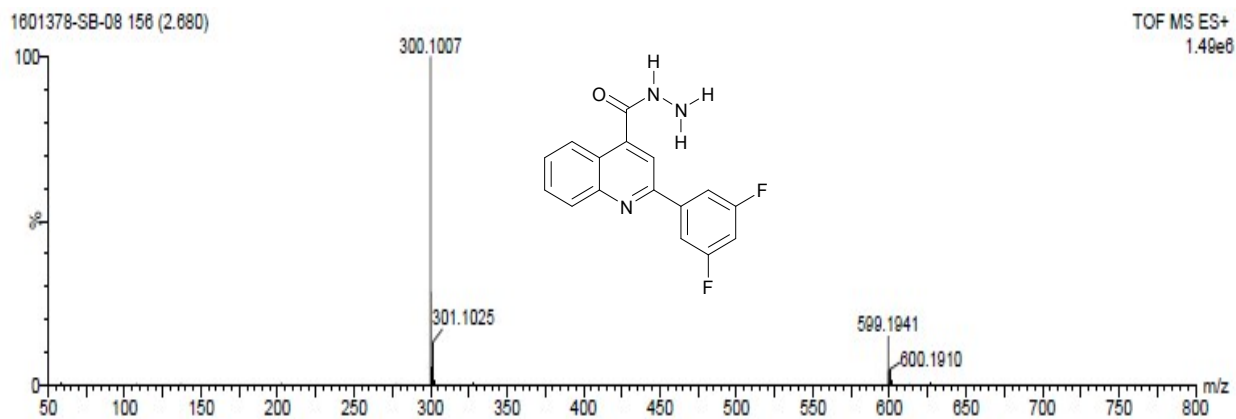

**LCMS Spectrum of compound (3) 2-(3,5-difluorophenyl)quinoline-4-carbohydrazide**

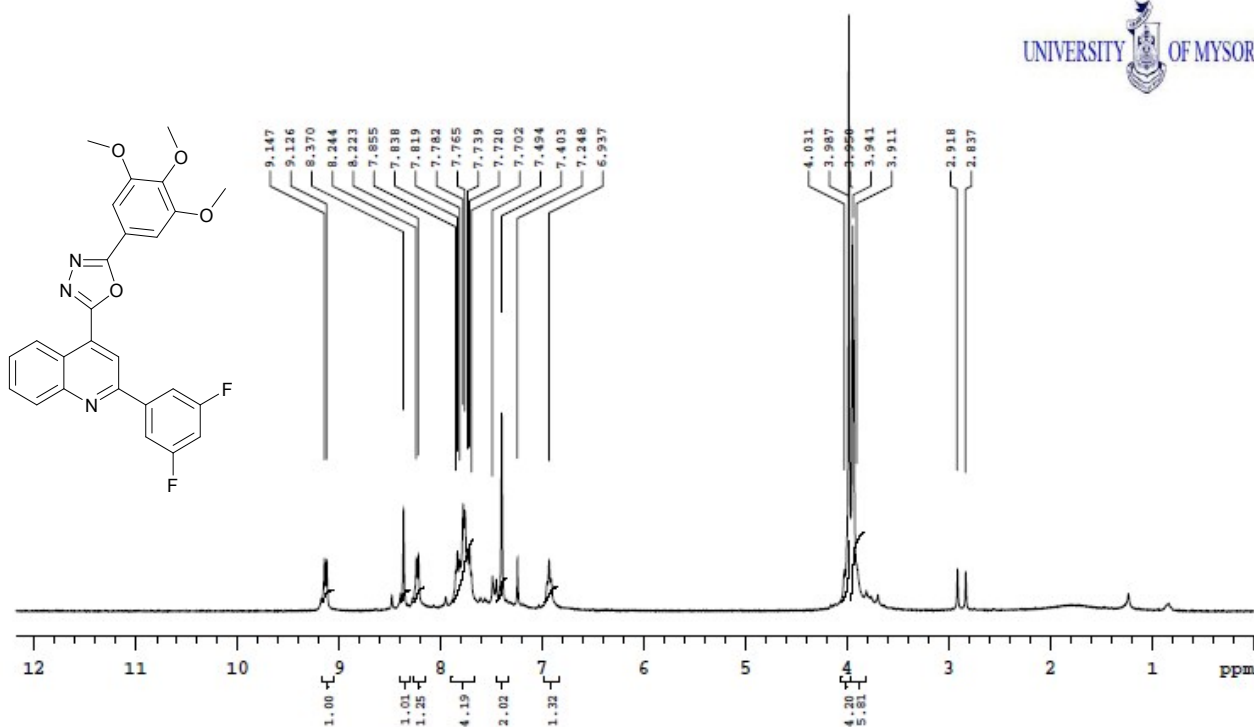

|                                                                                                                                                      |                                |                                                                                                      |                                                                                                                                                           |
|------------------------------------------------------------------------------------------------------------------------------------------------------|--------------------------------|------------------------------------------------------------------------------------------------------|-----------------------------------------------------------------------------------------------------------------------------------------------------------|
| <p>PULSE SEQUENCE</p> <p>Relax. delay 1.000 sec</p> <p>Pulse 45.0 degrees</p> <p>Acq. time 2.556 sec</p> <p>Width 7183.9 Hz</p> <p>8 repetitions</p> | <p>OBSERVE H1, 399.8257242</p> | <p>DATA PROCESSING</p> <p>Line broadening 0.3 Hz</p> <p>FT size 65536</p> <p>Total time 1 minute</p> | <p>1500192-SB-2-1H</p> <p>Solvent: cdcl3</p> <p>Ambient temperature</p> <p>Operator: vmr1</p> <p>File: 1500192-SB-2-1H</p> <p>VNMR8-400 *Agilent-NMR*</p> |
|------------------------------------------------------------------------------------------------------------------------------------------------------|--------------------------------|------------------------------------------------------------------------------------------------------|-----------------------------------------------------------------------------------------------------------------------------------------------------------|

**<sup>1</sup>H NMR spectrum of compound (4a) 2-(3,5-difluorophenyl)-4-(5-(3,4,5-trimethoxyphenyl)-1,3,4-oxadiazol-2-yl)quinoline**

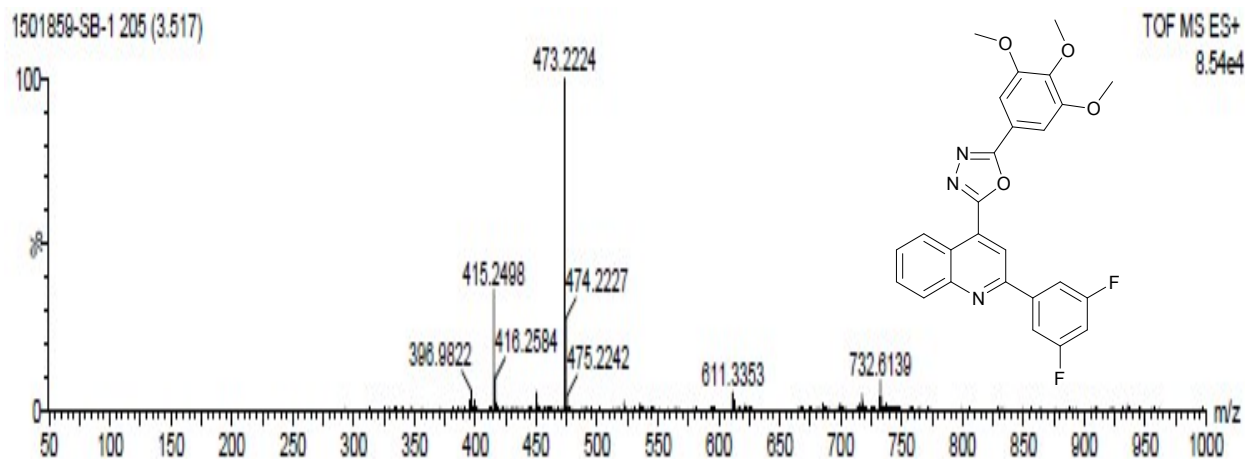

**LCMS Spectrum of compound (4a) 2-(3,5-difluorophenyl)-4-[5-(4-fluorophenyl)-1,3,4-oxadiazol-2-yl]quinolin**

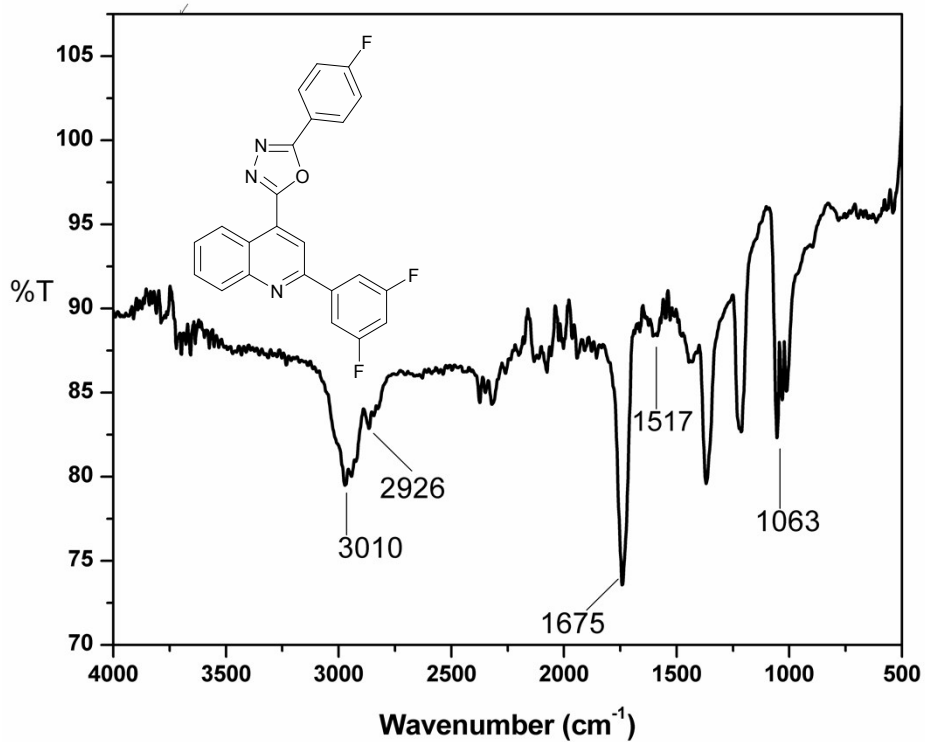

**IR spectrum of compound (4b) 2-(3,5-difluorophenyl)-4-[5-(4-fluorophenyl)-1,3,4-oxadiazol-2-yl]quinoline**

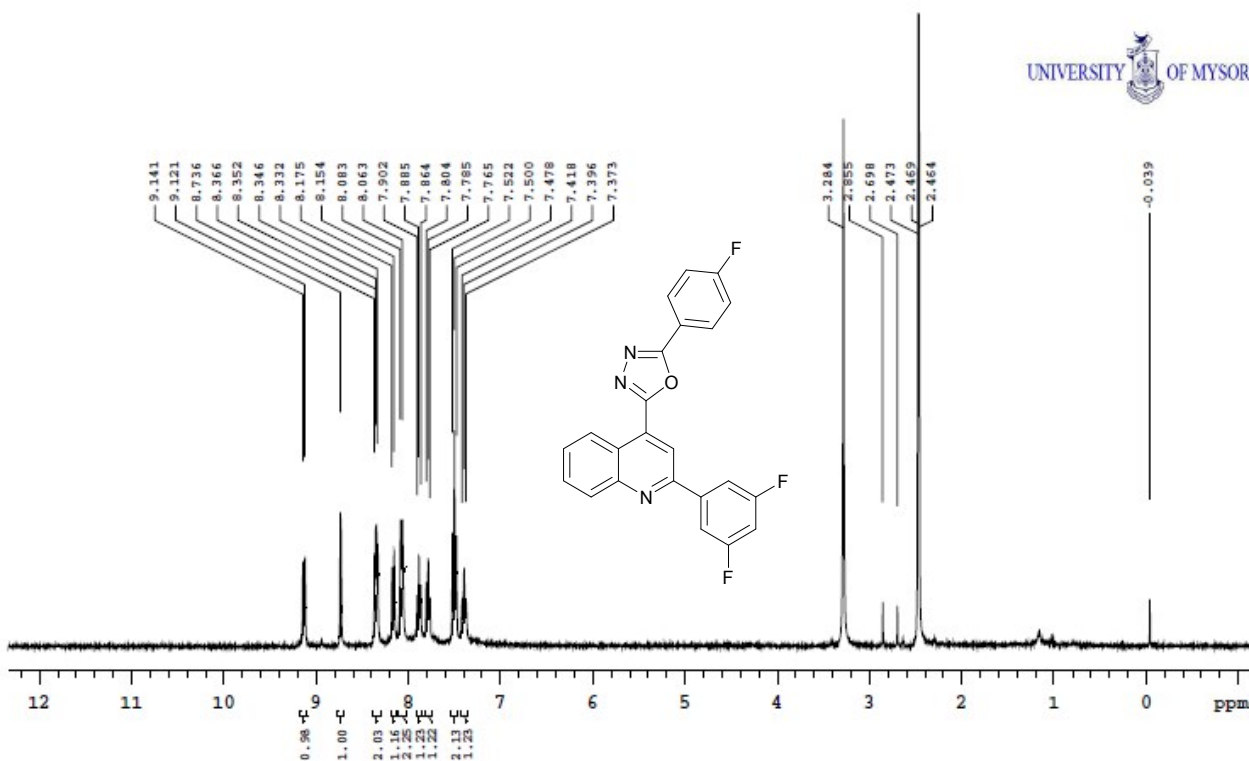

|                                                                                                                                                      |                                |                                                                        |                                                                                                                                                      |
|------------------------------------------------------------------------------------------------------------------------------------------------------|--------------------------------|------------------------------------------------------------------------|------------------------------------------------------------------------------------------------------------------------------------------------------|
| <p>PULSE SEQUENCE</p> <p>Relax. delay 1.000 sec</p> <p>Pulse 45.0 degrees</p> <p>Acq. time 2.045 sec</p> <p>Width 8012.8 Hz</p> <p>8 repetitions</p> | <p>OBSERVE H1, 399.8276233</p> | <p>DATA PROCESSING</p> <p>FT size 32768</p> <p>Total time 1 minute</p> | <p>1501516-SB1-1H</p> <p>Solvent: dmsc</p> <p>Ambient temperature</p> <p>Operator: IOB</p> <p>File: 1501516-SB1-1H</p> <p>VNMR-400 "Agilent-NMR"</p> |
|------------------------------------------------------------------------------------------------------------------------------------------------------|--------------------------------|------------------------------------------------------------------------|------------------------------------------------------------------------------------------------------------------------------------------------------|

**<sup>1</sup>H NMR spectrum of compound (4b) 2-(3,5-difluorophenyl)-4-[5-(4-fluorophenyl)-1,3,4-oxadiazol-2-yl]quinoline**

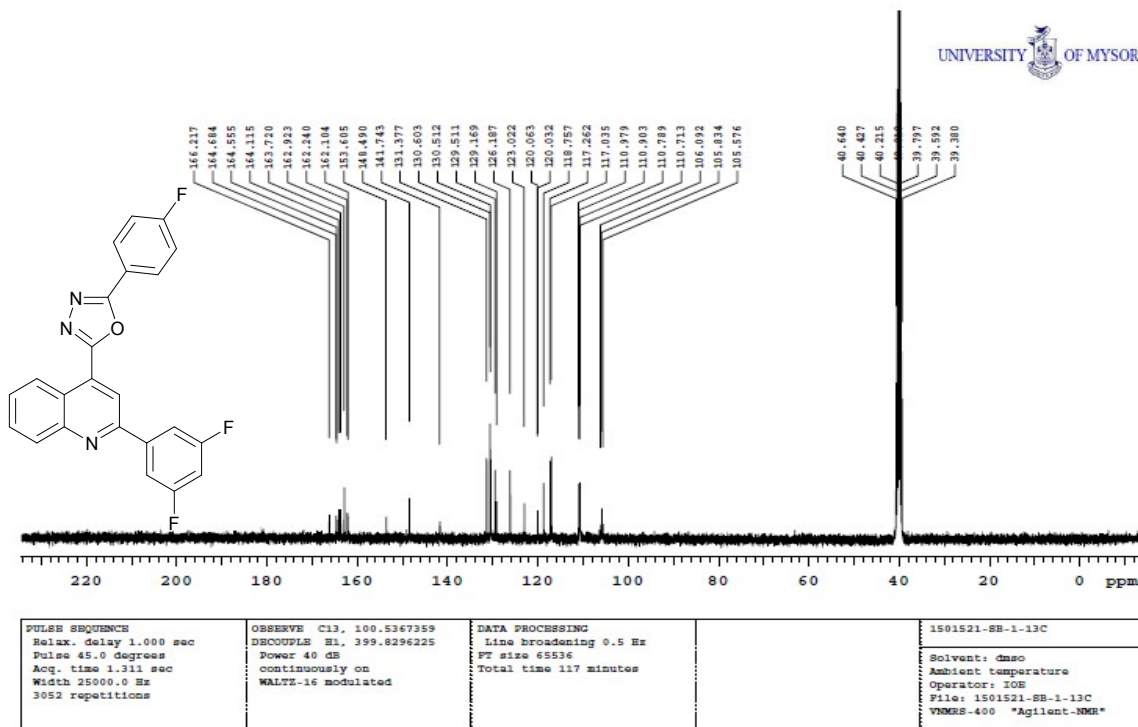

**<sup>13</sup>C NMR spectrum of compound (4b) 2-(3,5-difluorophenyl)-4-[5-(4-fluorophenyl)-1,3,4-oxadiazol-2-yl]quinoline**

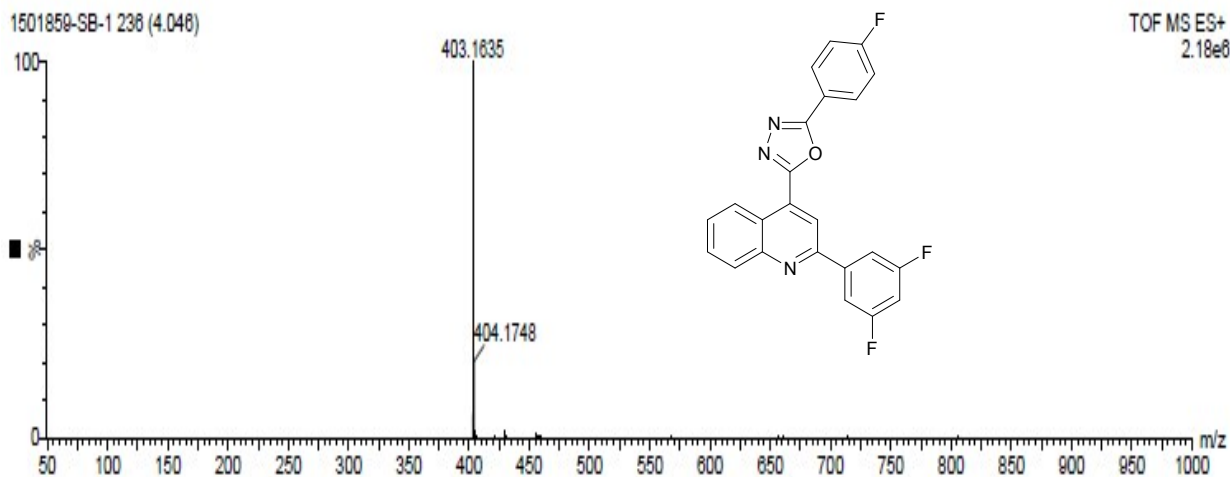

**LCMS Spectrum of compound (4b) 2-(3,5-difluorophenyl)-4-[5-(4-fluorophenyl)-1,3,4-oxadiazol-2-yl]quinoline**

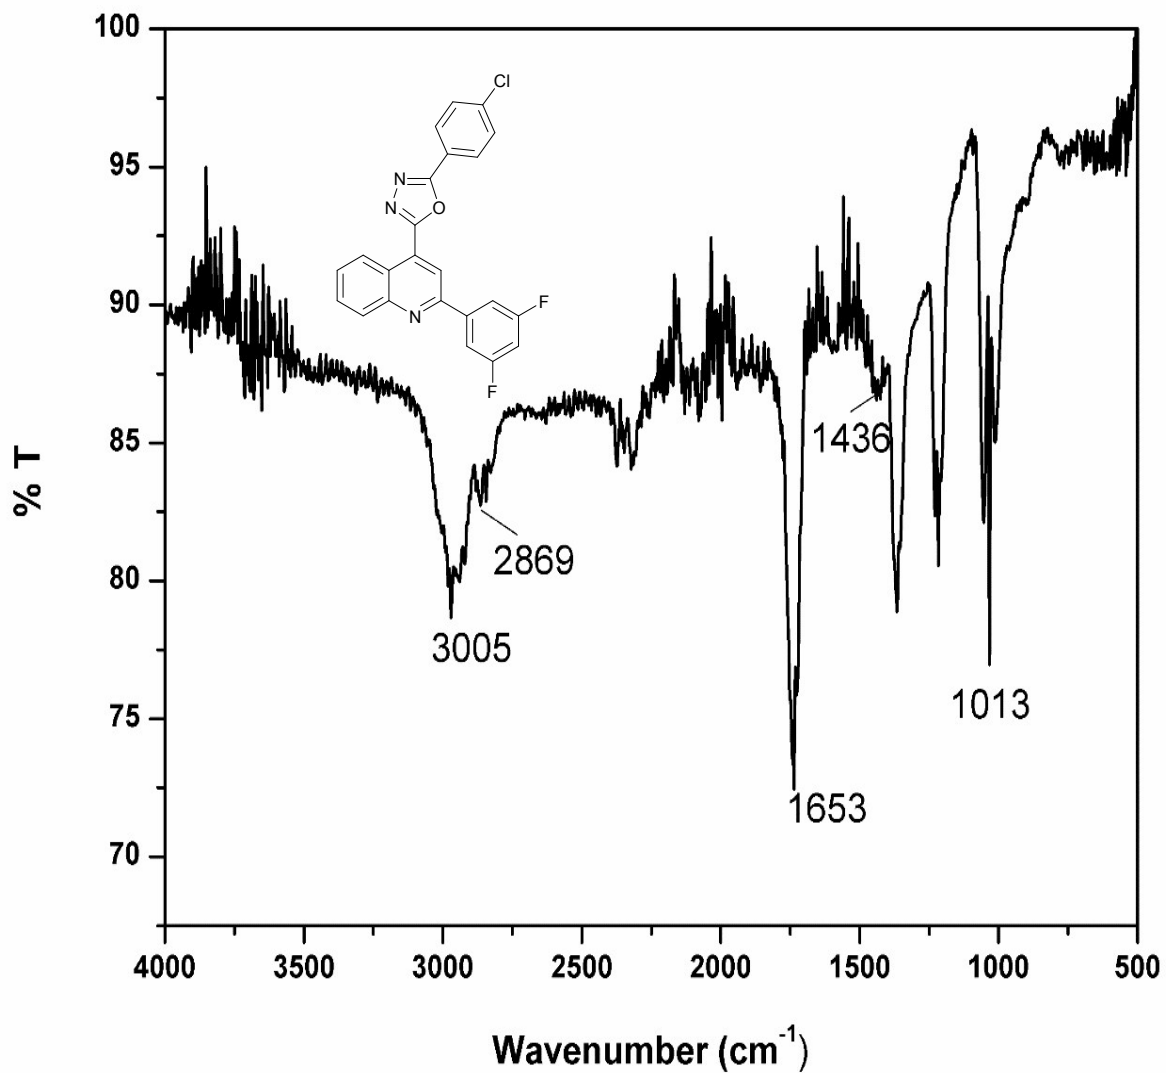

**IR spectrum of compound (4e) 4-(5-(4-chlorophenyl)-1,3,4-oxadiazol-2-yl)-2-(3,5-difluorophenyl) quinoline**

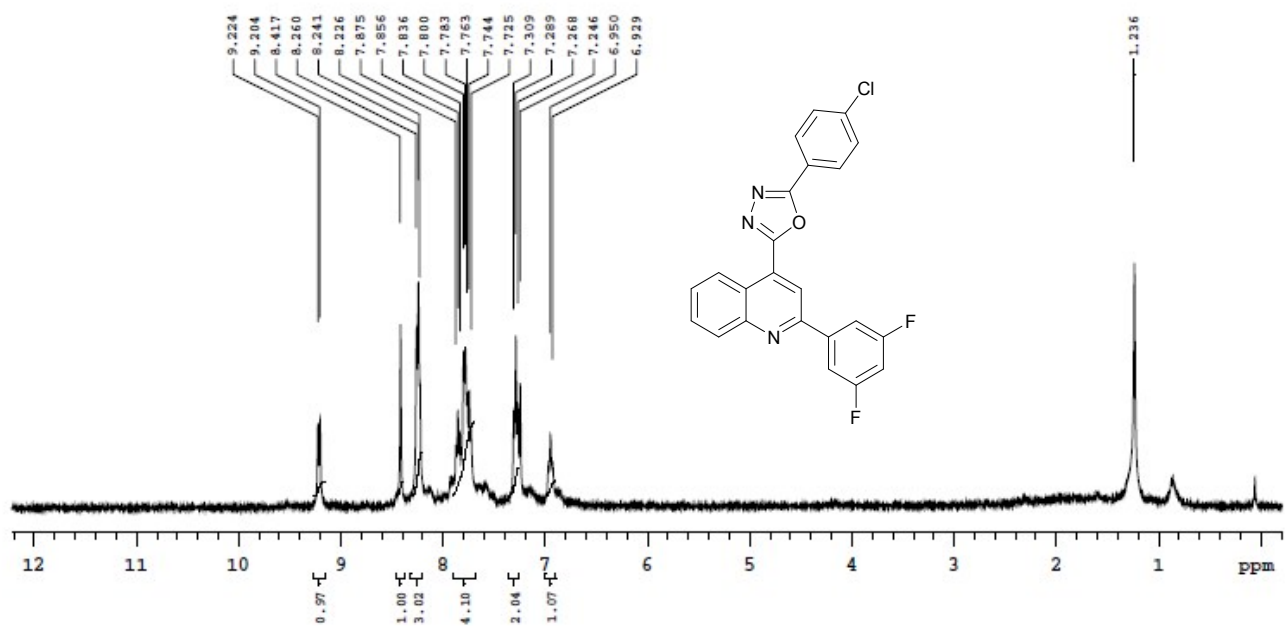

|                                                                                                                           |                         |                                                         |                                                                                                         |
|---------------------------------------------------------------------------------------------------------------------------|-------------------------|---------------------------------------------------------|---------------------------------------------------------------------------------------------------------|
| PULSE SEQUENCE<br>Relax. delay 1.000 sec<br>Pulse 45.0 degrees<br>Acq. time 2.556 sec<br>Width 6410.3 Hz<br>8 repetitions | OBSERVE H1, 399.8257242 | DATA PROCESSING<br>FT size 32768<br>Total time 1 minute | 1501705-4V-1H                                                                                           |
|                                                                                                                           |                         |                                                         | Solvent: cdcl3<br>Ambient temperature<br>Operator: IOB<br>File: 1501705-4V-1H<br>VNMR-400 *Agilent-NMR* |

**<sup>1</sup>H NMR spectrum of compound (4e) 4-(5-(4-chlorophenyl)-1,3,4-oxadiazol-2-yl)-2-(3,5-difluorophenyl)quinoline**



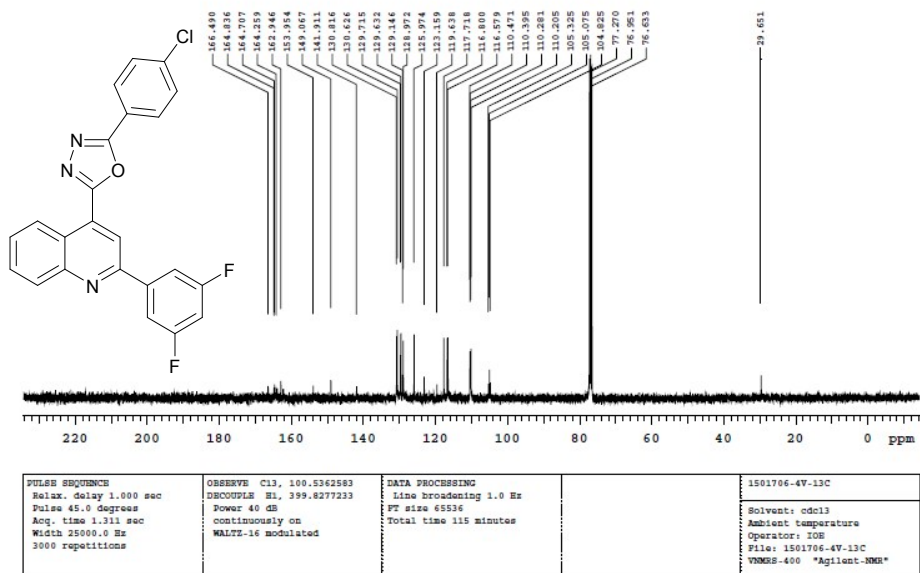

**<sup>13</sup>C NMR spectrum of compound (4e) 4-(5-(4-chlorophenyl)-1,3,4-oxadiazol-2-yl)-2-(3,5-difluorophenyl) quinoline**

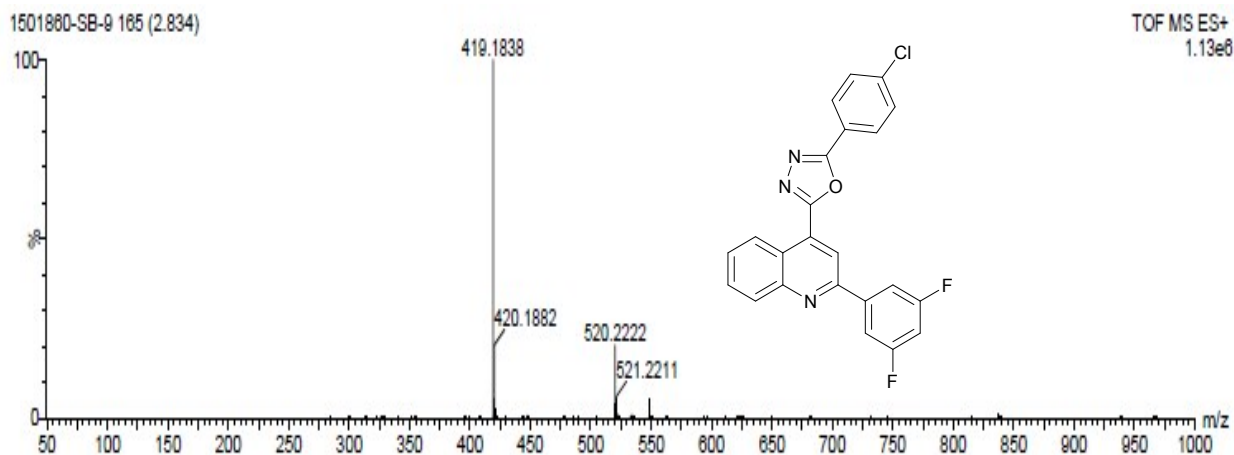

**LCMS Spectrum of compound (4e) 4-(5-(4-chlorophenyl)-1,3,4-oxadiazol-2-yl)-2-(3,5-difluorophenyl) quinoline**

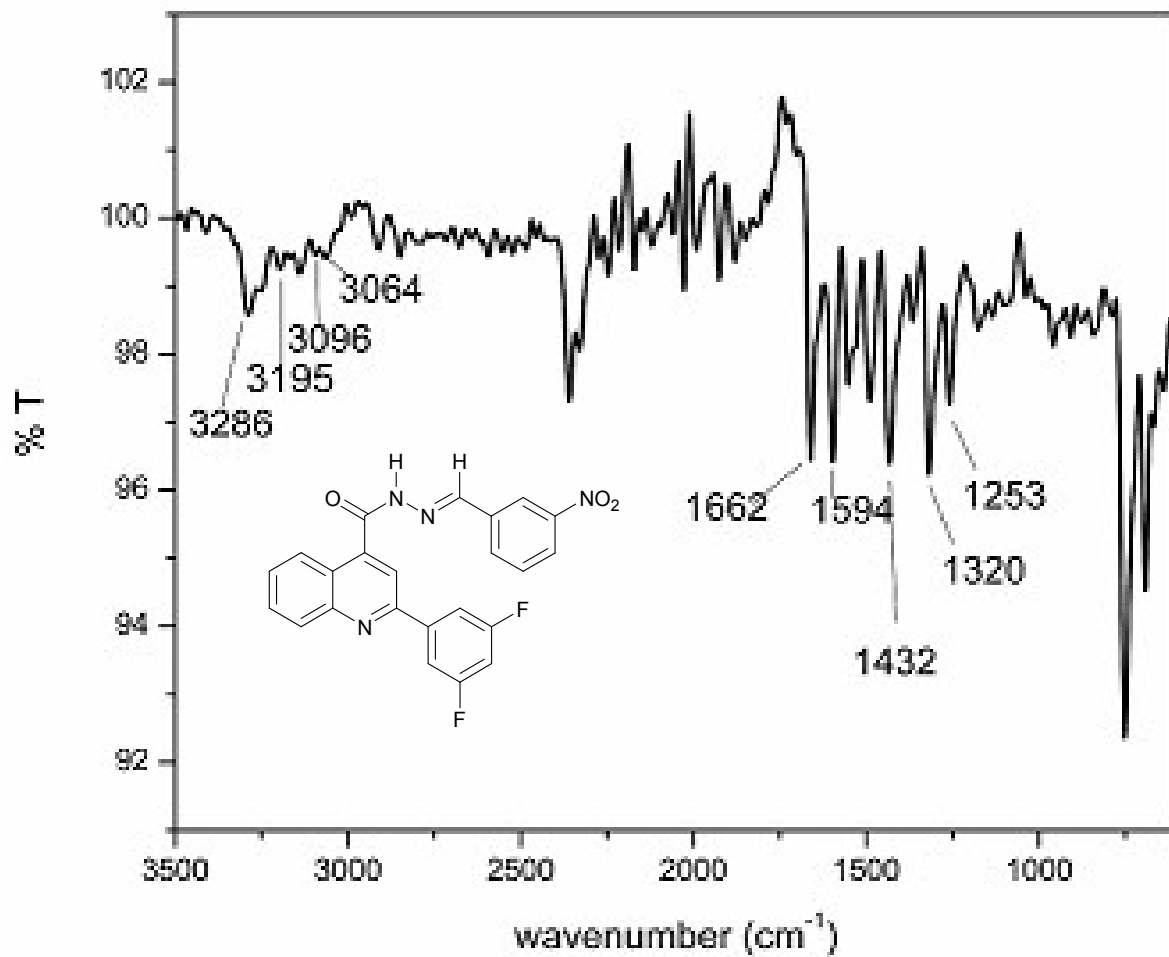

**IR spectrum of compound 5b. 2-(3,5-difluorophenyl)-N'-[(E)-(3-nitrophenyl)methylidene]quinoline-4-carbohydrazide**

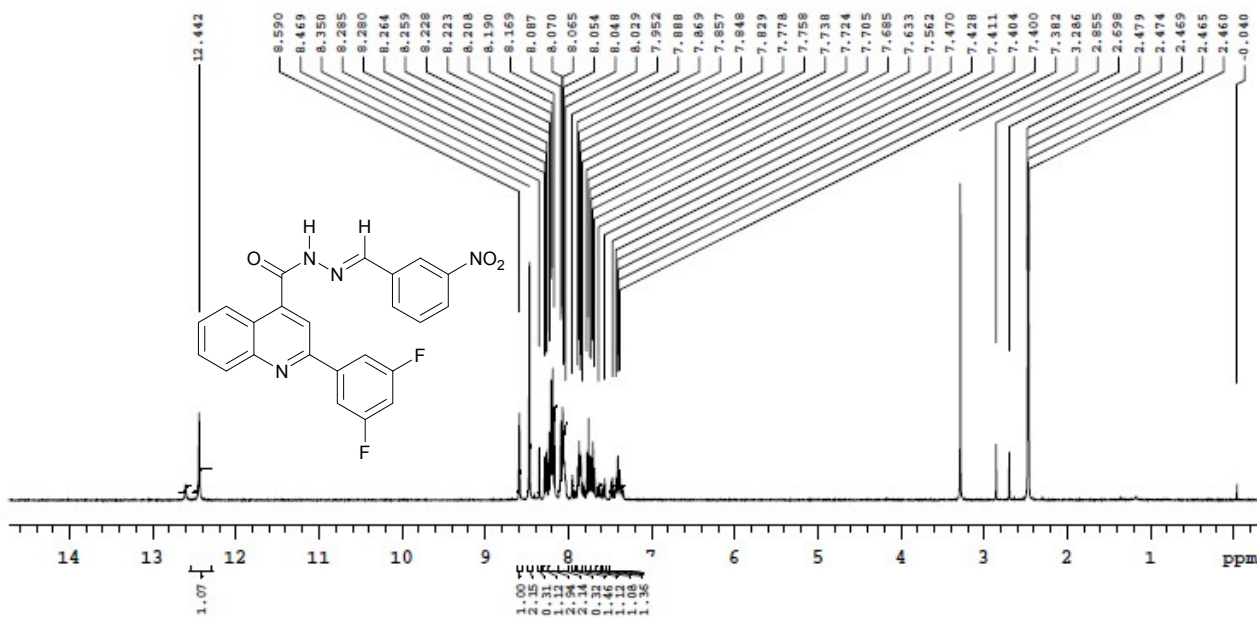

|                                                                                                                                       |                                |                                                                  |  |                                                                                                                                          |
|---------------------------------------------------------------------------------------------------------------------------------------|--------------------------------|------------------------------------------------------------------|--|------------------------------------------------------------------------------------------------------------------------------------------|
| <p>PULSE SEQUENCE<br/>Relax. delay 1.000 sec<br/>Pulse 45.0 degrees<br/>Acq. time 2.045 sec<br/>Width 8012.8 Hz<br/>8 repetitions</p> | <p>OBSERVE H1, 399.8276233</p> | <p>DATA PROCESSING<br/>FT size 32768<br/>Total time 1 minute</p> |  | <p>1501517-SB13-1H<br/>Solvent: dmsd<br/>Ambient temperature<br/>Operator: IOB<br/>File: 1501517-SB13-1H<br/>VNMRS-400 *Agilent-NMR*</p> |
|---------------------------------------------------------------------------------------------------------------------------------------|--------------------------------|------------------------------------------------------------------|--|------------------------------------------------------------------------------------------------------------------------------------------|

**<sup>1</sup>H NMR spectrum of compound 5b. 2-(3,5-difluorophenyl)-N'-[(E)-(3-nitrophenyl)methylidene]quinoline-4-carbohydrazide**

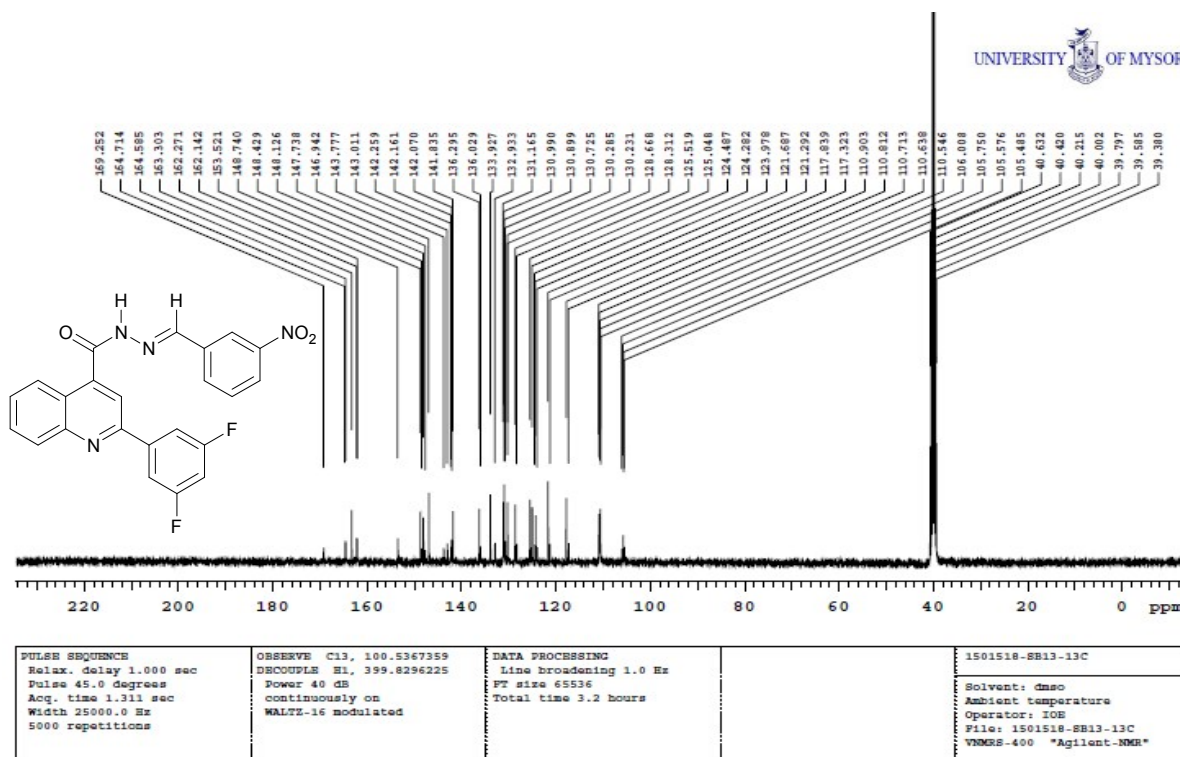

**<sup>13</sup>C NMR spectrum of compound 5b. 2-(3,5-difluorophenyl)-N'-[(E)-(3-nitrophenyl)methylidene]quinoline-4-carbohydrazide**

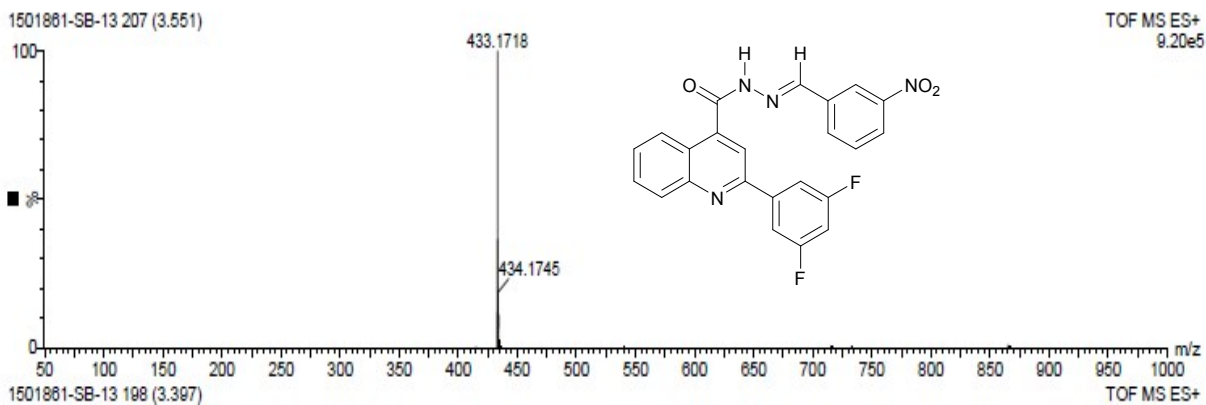

**LCMS Spectrum of compound (5b) 2-(3,5-difluorophenyl)-N'-[(E)-(3-nitrophenyl)methylidene]quinoline-4-carbohydrazide**

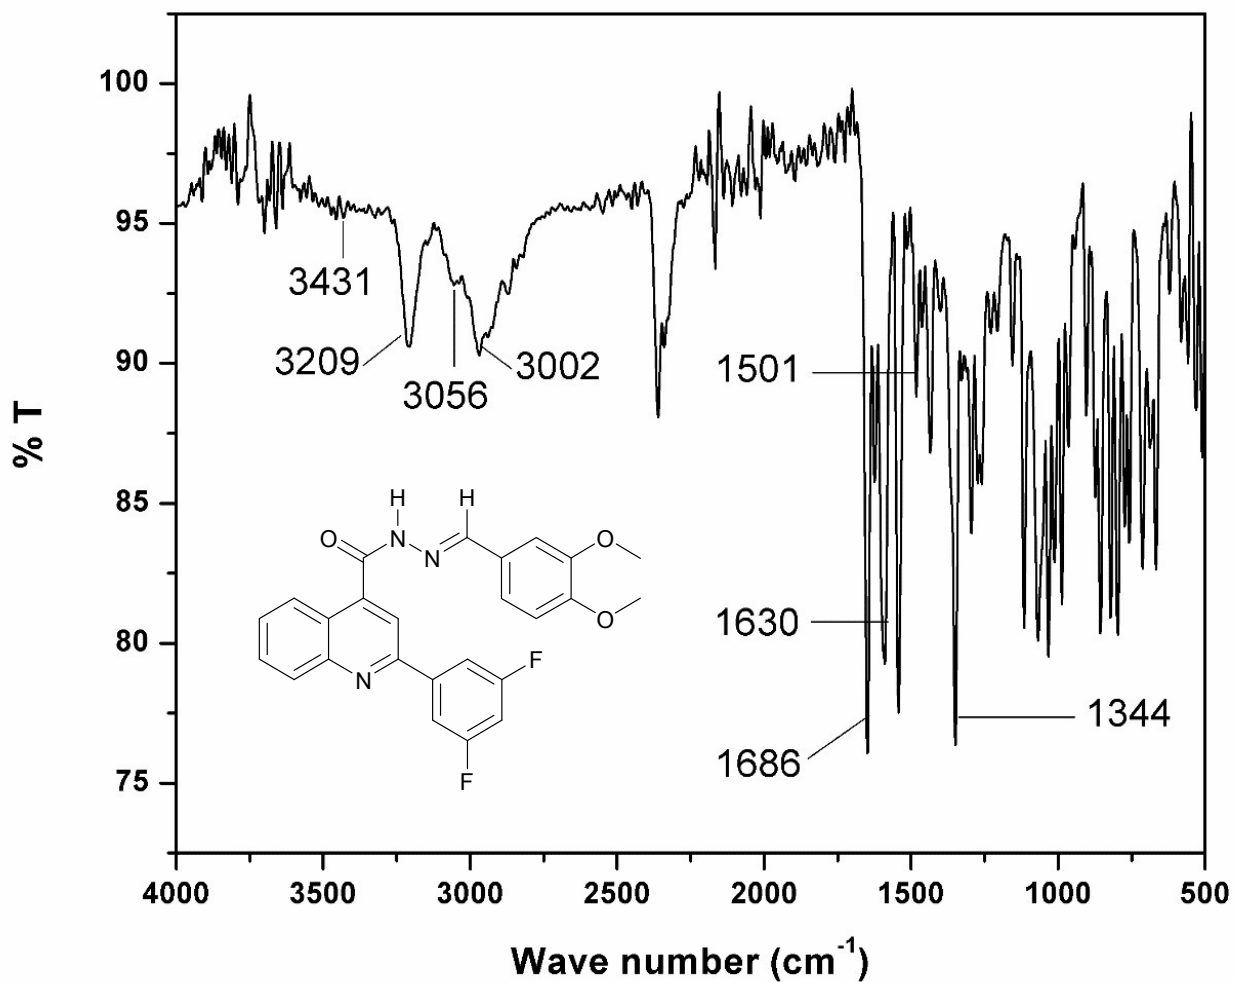

IR- spectrum of compound (5d) (E)-N'-(3,4-dimethoxybenzylidene)-2-(3,5-difluorophenyl)quinoline-4-carbohydrazide

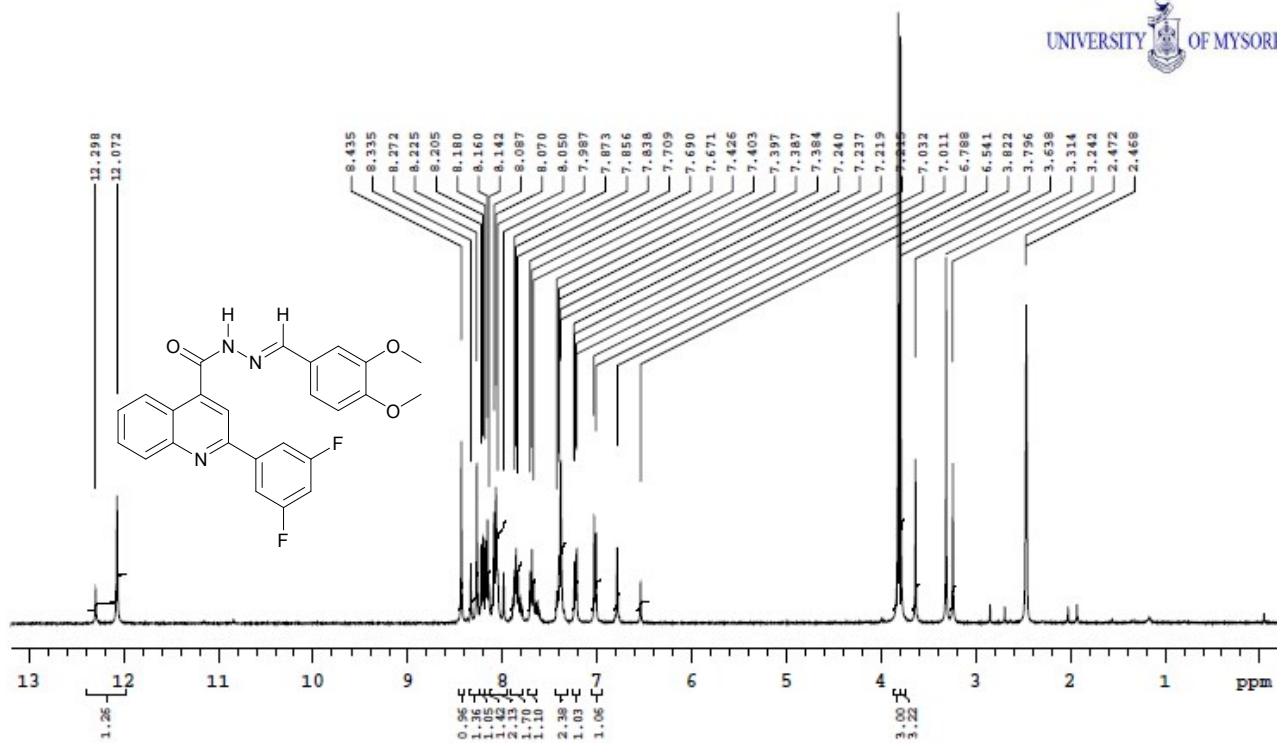

|                                                                                                                                                      |                                |                                                                        |                                                                                                                                                           |
|------------------------------------------------------------------------------------------------------------------------------------------------------|--------------------------------|------------------------------------------------------------------------|-----------------------------------------------------------------------------------------------------------------------------------------------------------|
| <p>PULSE SEQUENCE</p> <p>Relax. delay 1.000 sec</p> <p>Pulse 45.0 degrees</p> <p>Acq. time 2.556 sec</p> <p>Width 6410.3 Hz</p> <p>8 repetitions</p> | <p>OBSERVE H1, 399.8276233</p> | <p>DATA PROCESSING</p> <p>FT size 32768</p> <p>Total time 1 minute</p> | <p>1501524-SB-15-1H</p> <p>Solvent: dmsc</p> <p>Ambient temperature</p> <p>Operator: IOE</p> <p>File: 1501524-SB-15-1H</p> <p>VNMHS-400 *Agilent-NMR*</p> |
|------------------------------------------------------------------------------------------------------------------------------------------------------|--------------------------------|------------------------------------------------------------------------|-----------------------------------------------------------------------------------------------------------------------------------------------------------|

<sup>1</sup>H NMR spectrum of compound (5d) (E)-N'-(3,4-dimethoxybenzylidene)-2-(3,5-difluorophenyl)quinoline-4-carbohydrazide

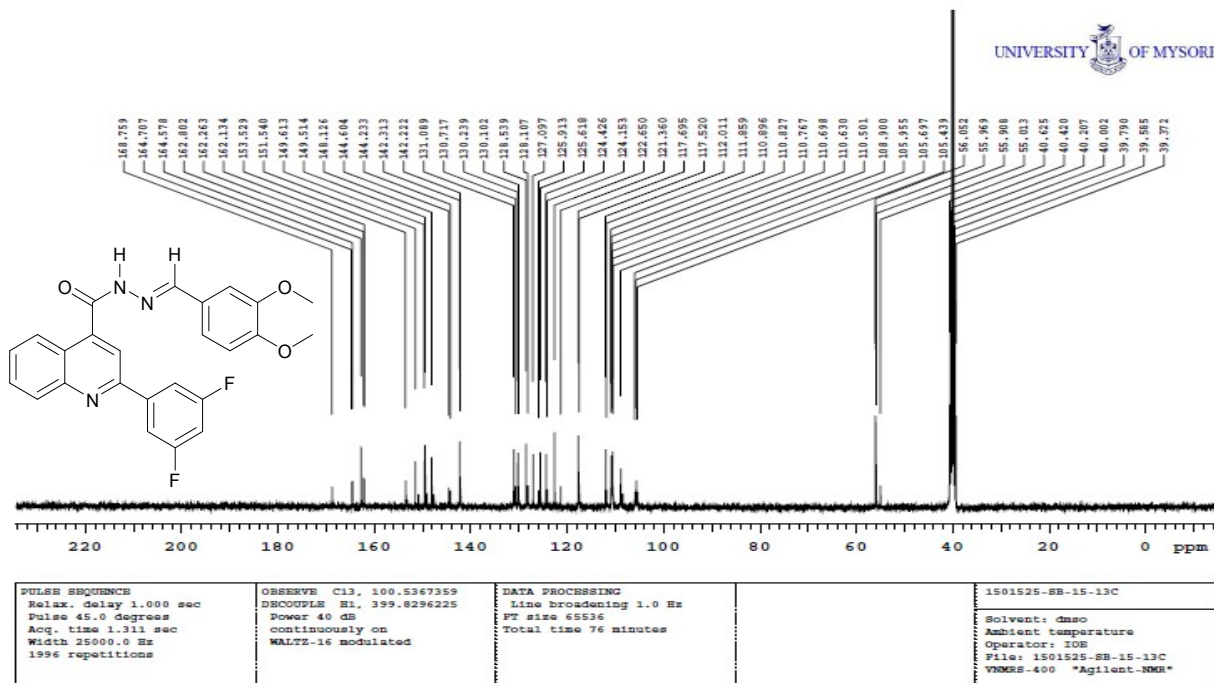

**<sup>13</sup>C NMR spectrum of compound (5d) (E)-N'-(3,4-dimethoxybenzylidene)-2-(3,5-difluorophenyl)quinoline-4-carbohydrazide**

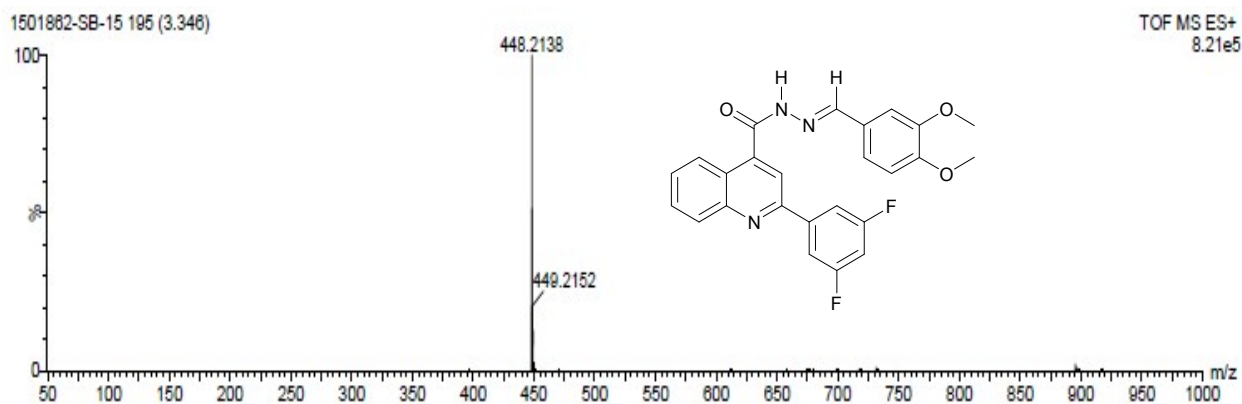

**LCMS spectrum of compound (5d) (E)-N'-(3,4-dimethoxybenzylidene)-2-(3,5-difluorophenyl)quinoline-4-carbohydrazide**
